# Supplementary material for: Establishment of a Finite Element Model of Supination-external Rotation Ankle Joint Injury and Analysis of Mechanical Changes in the Posterior Malleolar Surface
Source: Research Square preprint supplement (doi:10.21203/rs.3.rs-1036053/v1), 2021-11-11
Supplement: Supplementary file 1 [file 4d504b4a746532fb7b107ace.pdf]

This document certifies that the manuscript

**Establishment of finite element model of supination external rotation ankle joint injury and analysis of mechanical changes of posterior malleolus surface**

prepared by the authors

**Xin Zhang, Pinliang Xie, Weirong Shao, Ming Xu, Xiaoping Xu, Yong Yin, Lan Fei**

was edited for proper English language, grammar, punctuation, spelling, and overall style by one or more of the highly qualified native English speaking editors at AJE.

This certificate was issued on **October 6, 2021** and may be verified on the [AJE website](https://aje.com) using the verification code **063D-F030-3756-3DFA-4F6P**.

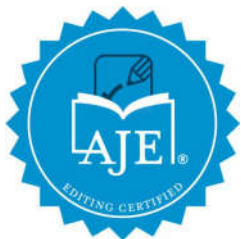

Neither the research content nor the authors' intentions were altered in any way during the editing process. Documents receiving this certification should be English-ready for publication; however, the author has the ability to accept or reject our suggestions and changes. To verify the final AJE edited version, please visit our verification page at [aje.com/certificate](https://aje.com/certificate). If you have any questions or concerns about this edited document, please contact AJE at [support@aje.com](mailto:support@aje.com).
